# Supplementary material for: Body Temperature, Heart Rate, and Short-Term Outcome of Cooled Infants
Source: PubMed Central journal article supplement (PMC6434598; doi:10.1089/ther.2018.0019), 2019-03-06
Supplement: Supp_Table1.pdf [file Supp_Table1.pdf]

## Supplementary Data

SUPPLEMENTARY TABLE S1. FULL INDEPENDENT VARIABLES OF SHORT-TERM OUTCOMES

| <i>Background clinical variables</i>                                              | <i>Death during initial hospitalization</i> |                   |                    | <i>95% CI</i>  |              | <i>p</i> |
|-----------------------------------------------------------------------------------|---------------------------------------------|-------------------|--------------------|----------------|--------------|----------|
|                                                                                   | <i>Yes (n=14)</i>                           | <i>No (n=495)</i> | <i>OR</i>          | <i>Lower</i>   | <i>Upper</i> |          |
| <b>(A) Full independent variables of the death during initial hospitalization</b> |                                             |                   |                    |                |              |          |
| Year of birth                                                                     |                                             |                   |                    | Reference      |              |          |
| 2012                                                                              | 7 (3.7)                                     | 180 (96.3)        | 1                  |                |              |          |
| 2013                                                                              | 3 (1.9)                                     | 158 (98.1)        | 0.647              | 0.172          | 2.427        | 0.518    |
| 2014                                                                              | 4 (2.5)                                     | 157 (97.5)        | 0.781              | 0.223          | 2.731        | 0.698    |
| Gestational age (weeks)                                                           | 38.6±1.8                                    | 38.9±1.7          | 0.876              | 0.655          | 1.173        | 0.374    |
| Birth weight (kg)                                                                 | 2.8±0.5                                     | 2.9±0.5           | 0.831              | 0.274          | 2.521        | 0.743    |
| Birth location                                                                    |                                             |                   |                    | Reference      |              |          |
| Outborn                                                                           | 11 (3.0)                                    | 350 (97.0)        | 1                  |                |              |          |
| Inborn                                                                            | 3 (2.0)                                     | 145 (98.0)        | 0.657              | 0.172          | 2.502        | 0.536    |
| 10 minutes Apgar score                                                            | 2 (1–5)                                     | 5 (3–7)           | 0.705              | 0.527          | 0.942        | 0.020    |
| Cord or first blood gas <1 hour of birth                                          |                                             |                   |                    |                |              |          |
| pH                                                                                | 6.85±0.29                                   | 6.95±0.21         | 0.814 <sup>a</sup> | 0.602          | 1.101        | 0.177    |
| Base excess (mmol/L)                                                              | -19.8±12.0                                  | -14.5±10.6        | 0.796 <sup>b</sup> | 0.442          | 1.432        | 0.437    |
| Sarnat encephalopathy stage at admission                                          |                                             |                   |                    | Reference      |              |          |
| Stage I                                                                           | 0 (0.0)                                     | 61 (100.0)        |                    | Not applicable |              |          |
| Stage II                                                                          | 4 (1.3)                                     | 298 (98.7)        | 1                  | Reference      |              |          |
| Stage III                                                                         | 10 (7.6)                                    | 122 (92.4)        | 7.394              | 2.307          | 23.704       | 0.001    |
| Thompson encephalopathy score                                                     |                                             |                   |                    |                |              |          |
| At admission                                                                      | 18 (16–19)                                  | 10 (7–14)         | 1.261              | 1.108          | 1.434        | <0.001   |
| 24 hours <sup>c</sup>                                                             | 16 (13–18)                                  | 10 (5–13)         | 1.169              | 1.047          | 1.304        | 0.006    |
| 48 hours <sup>c</sup>                                                             | 16 (11–17)                                  | 9 (3–13)          | 1.145              | 1.033          | 1.269        | 0.010    |
| 72 hours <sup>c</sup>                                                             | 15 (0–18)                                   | 6 (0–12)          | 1.111              | 1.015          | 1.215        | 0.022    |
| Maximum score                                                                     | 18 (16–19)                                  | 11 (8–15)         | 1.267              | 1.099          | 1.461        | 0.001    |
| Cooling modality                                                                  |                                             |                   |                    | Reference      |              |          |
| Selective-head                                                                    | 9 (5.1)                                     | 167 (94.9)        | 1                  |                |              |          |
| Whole-body                                                                        | 5 (1.5)                                     | 327 (98.5)        | 0.343              | 0.108          | 1.089        | 0.069    |
| Additive neuroprotective drug                                                     |                                             |                   |                    |                |              |          |
| Magnesium sulfate                                                                 | 5 (4.0)                                     | 121 (96.0)        | 1.427              | 0.478          | 4.263        | 0.524    |
| Erythropoietin                                                                    | 0 (0.0)                                     | 17 (100.0)        |                    | Not applicable |              |          |
| Phenobarbital                                                                     | 0 (0.0)                                     | 5 (100.0)         |                    | Not applicable |              |          |
| Any of above                                                                      | 5 (1.5)                                     | 155 (96.9)        | 0.979              | 0.330          | 2.907        | 0.970    |
| Time of admission after birth <sup>a</sup>                                        | 112±90                                      | 107±83            | 1.020 <sup>d</sup> | 0.964          | 1.081        | 0.488    |
| Initiating cooling after admission <sup>a</sup>                                   | 121±103                                     | 105±86            | 1.017 <sup>d</sup> | 0.958          | 1.080        | 0.584    |
| Initiating cooling after birth <sup>a</sup>                                       | 233±104                                     | 212±96            | 1.034 <sup>d</sup> | 0.979          | 1.093        | 0.229    |
| Time to target temperature after initiating cooling <sup>a</sup>                  | 45±106                                      | 95±155            | 0.961 <sup>d</sup> | 0.883          | 1.047        | 0.355    |
| Time to target temperature after birth <sup>a</sup>                               | 292±165                                     | 307±188           | 0.998 <sup>d</sup> | 0.968          | 1.028        | 0.888    |
| <b><i>Physiological variables during cooling</i></b>                              |                                             |                   |                    |                |              |          |
| Heart rate (per 10 beat/min)                                                      |                                             |                   |                    |                |              |          |
| 0 hour <sup>c</sup>                                                               | 142±21                                      | 132±20            | 1.226 <sup>e</sup> | 0.957          | 1.570        | 0.107    |
| 3 hours <sup>c</sup>                                                              | 138±17                                      | 116±20            | 1.550 <sup>e</sup> | 1.201          | 2.001        | 0.001    |
| 6 hours <sup>c</sup>                                                              | 138±19                                      | 114±20            | 1.639 <sup>e</sup> | 1.227          | 2.190        | 0.001    |
| 12 hours <sup>c</sup>                                                             | 135±13                                      | 115±19            | 1.603 <sup>e</sup> | 1.211          | 2.120        | 0.001    |
| 24 hours <sup>c</sup>                                                             | 133±14                                      | 114±18            | 1.777 <sup>e</sup> | 1.206          | 2.618        | 0.005    |
| 36 hours <sup>c</sup>                                                             | 139±16                                      | 112±16            | 2.336 <sup>e</sup> | 1.633          | 3.343        | <0.001   |
| 48 hours <sup>c</sup>                                                             | 131±11                                      | 109±17            | 2.124 <sup>e</sup> | 1.485          | 3.038        | <0.001   |
| 60 hours <sup>c</sup>                                                             | 127±10                                      | 109±16            | 1.782 <sup>e</sup> | 1.315          | 2.416        | <0.001   |
| 72 hours <sup>c</sup>                                                             | 125±19                                      | 109±16            | 1.711 <sup>e</sup> | 1.208          | 2.423        | 0.004    |
| 84 hours <sup>c</sup>                                                             | 138±23                                      | 121±19            | 1.428 <sup>e</sup> | 0.831          | 2.452        | 0.166    |
| Mean (0–84 hours <sup>c</sup> )                                                   | 135±14                                      | 115±14            | 2.589 <sup>e</sup> | 1.708          | 3.922        | <0.001   |
| Mean (3–72 hours <sup>c</sup> )                                                   | 133±14                                      | 113±14            | 2.595 <sup>e</sup> | 1.749          | 3.850        | <0.001   |
| Mean blood pressure (per 10 mmHg)                                                 |                                             |                   |                    |                |              |          |
| 0 hour <sup>c</sup>                                                               | 41±12                                       | 46±10             | 0.588 <sup>f</sup> | 0.347          | 0.995        | 0.048    |
| 3 hours <sup>c</sup>                                                              | 39±10                                       | 47±9              | 0.407 <sup>f</sup> | 0.222          | 0.744        | 0.004    |
| 6 hours <sup>c</sup>                                                              | 41±12                                       | 47±9              | 0.475 <sup>f</sup> | 0.240          | 0.941        | 0.033    |
| 12 hours <sup>c</sup>                                                             | 41±14                                       | 47±8              | 0.424 <sup>f</sup> | 0.215          | 0.835        | 0.013    |

*(continued)*

SUPPLEMENTARY TABLE S1. (CONTINUED)

| <i>Background clinical variables</i>                   | <i>Death during initial hospitalization</i> |                     |                    | <i>95% CI</i>  |              | <i>p</i> |
|--------------------------------------------------------|---------------------------------------------|---------------------|--------------------|----------------|--------------|----------|
|                                                        | <i>Yes (n = 14)</i>                         | <i>No (n = 495)</i> | <i>OR</i>          | <i>Lower</i>   | <i>Upper</i> |          |
| 24 hours <sup>c</sup>                                  | 41 ± 10                                     | 47 ± 8              | 0.306 <sup>f</sup> | 0.118          | 0.792        | 0.017    |
| 36 hours <sup>c</sup>                                  | 48 ± 9                                      | 48 ± 7              | 0.859 <sup>f</sup> | 0.347          | 2.128        | 0.733    |
| 48 hours <sup>c</sup>                                  | 53 ± 9                                      | 49 ± 7              | 1.494 <sup>f</sup> | 0.710          | 3.144        | 0.285    |
| 60 hours <sup>c</sup>                                  | 53 ± 11                                     | 50 ± 8              | 1.013 <sup>f</sup> | 0.305          | 3.365        | 0.981    |
| 72 hours <sup>c</sup>                                  | 49 ± 6                                      | 52 ± 8              | 0.581 <sup>f</sup> | 0.193          | 1.747        | 0.304    |
| 84 hours <sup>c</sup>                                  | 52 ± 4                                      | 50 ± 8              | 0.927 <sup>f</sup> | 0.416          | 2.064        | 0.845    |
| Mean (0–84 hours <sup>c</sup> )                        | 42 ± 10                                     | 48 ± 5              | 0.297 <sup>f</sup> | 0.090          | 0.976        | 0.046    |
| Mean (3–72 hours <sup>c</sup> )                        | 42 ± 10                                     | 49 ± 6              | 0.295 <sup>f</sup> | 0.083          | 1.051        | 0.059    |
| <b>Body temperature (per degree)</b>                   |                                             |                     |                    |                |              |          |
| At admission                                           | 35.2 ± 1.0                                  | 36.0 ± 1.3          | 0.653              | 0.463          | 0.922        | 0.016    |
| 0 hour <sup>c</sup>                                    | 34.5 ± 1.3                                  | 35.3 ± 1.3          | 0.639              | 0.425          | 0.960        | 0.031    |
| 3 hours <sup>c</sup>                                   | 34.0 ± 0.7                                  | 33.8 ± 0.7          | 1.360              | 0.719          | 2.573        | 0.344    |
| 6 hours <sup>c</sup>                                   | 34.2 ± 0.7                                  | 33.8 ± 0.6          | 2.110              | 1.126          | 3.954        | 0.020    |
| 12 hours <sup>c</sup>                                  | 34.0 ± 0.7                                  | 33.8 ± 0.6          | 1.439              | 0.675          | 3.069        | 0.346    |
| 24 hours <sup>c</sup>                                  | 34.2 ± 1.2                                  | 33.8 ± 0.5          | 3.558              | 1.631          | 7.761        | 0.002    |
| 36 hours <sup>c</sup>                                  | 34.1 ± 0.9                                  | 33.8 ± 0.5          | 4.097              | 1.821          | 9.218        | 0.001    |
| 48 hours <sup>c</sup>                                  | 33.7 ± 0.4                                  | 33.8 ± 0.5          | 2.250              | 1.009          | 5.017        | 0.047    |
| 60 hours <sup>c</sup>                                  | 33.8 ± 0.4                                  | 33.8 ± 0.5          | 2.226              | 1.055          | 4.693        | 0.036    |
| 72 hours <sup>c</sup>                                  | 33.8 ± 0.4                                  | 33.8 ± 0.6          | 1.795              | 0.767          | 4.199        | 0.170    |
| 84 hours <sup>c</sup>                                  | 34.9 ± 1.0                                  | 35.7 ± 1.0          | 0.974              | 0.399          | 2.374        | 0.947    |
| Mean (0–84 hours <sup>c</sup> )                        | 34.2 ± 0.7                                  | 34.1 ± 0.4          | 2.179              | 0.715          | 6.635        | 0.168    |
| Mean (3–72 hours <sup>c</sup> )                        | 34.1 ± 0.7                                  | 33.8 ± 0.5          | 2.268              | 1.063          | 4.842        | 0.034    |
| Fever ≥ 37.5°C from admission to 84 hours <sup>c</sup> | 0 (0.0)                                     | 50 (100.0)          |                    | Not applicable |              |          |
| Fever ≥ 38°C from admission to 84 hours <sup>c</sup>   | 0 (0.0)                                     | 18 (100.0)          |                    | Not applicable |              |          |

<sup>a</sup>Per 0.1 change.

<sup>b</sup>Per 10 mmol/L.

<sup>c</sup>After initiating cooling.

<sup>d</sup>Per 10 minutes.

<sup>e</sup>Per 10 beat/min.

<sup>f</sup>Per 10 mmHg.

| <i>Background clinical variables</i>                                               | <i>Survival discharge ≤ 28 days</i> |                     |                    | <i>95% CI</i> |              | <i>p</i> |
|------------------------------------------------------------------------------------|-------------------------------------|---------------------|--------------------|---------------|--------------|----------|
|                                                                                    | <i>Yes (n = 262)</i>                | <i>No (n = 247)</i> | <i>OR</i>          | <i>Lower</i>  | <i>Upper</i> |          |
| <b>(B) Full independent variables of survival discharge within 28 days of life</b> |                                     |                     |                    |               |              |          |
| <b>Year of birth</b>                                                               |                                     |                     |                    |               |              |          |
| 2012                                                                               | 88 (47.1)                           | 99 (52.9)           | 1                  | Reference     |              |          |
| 2013                                                                               | 83 (51.6)                           | 78 (48.4)           | 1.197              | 0.785         | 1.825        | 0.403    |
| 2014                                                                               | 91 (56.5)                           | 70 (43.5)           | 1.463              | 0.957         | 2.234        | 0.079    |
| Gestational age (weeks)                                                            | 39.1 ± 1.6                          | 38.7 ± 1.8          | 1.152              | 1.040         | 1.278        | 0.007    |
| Birth weight (kg)                                                                  | 2.9 ± 0.4                           | 2.9 ± 0.5           | 1.094              | 0.760         | 1.576        | 0.628    |
| <b>Birth location</b>                                                              |                                     |                     |                    |               |              |          |
| Outborn                                                                            | 174 (48.2)                          | 187 (51.8)          | 1                  | Reference     |              |          |
| Inborn                                                                             | 88 (59.5)                           | 60 (40.5)           | 1.576              | 1.070         | 2.323        | 0.021    |
| 10 minutes Apgar score                                                             | 6 (4–7)                             | 4 (2–5)             | 1.500              | 1.362         | 1.652        | <0.001   |
| <b>Cord or first blood gas &lt;1 hour of birth</b>                                 |                                     |                     |                    |               |              |          |
| pH                                                                                 | 6.98 ± 0.18                         | 6.90 ± 0.23         | 1.212 <sup>a</sup> | 1.109         | 1.325        | <0.001   |
| Base excess (mmol/L)                                                               | –12.1 ± 9.6                         | –17.4 ± 11.1        | 1.575 <sup>b</sup> | 1.315         | 1.887        | <0.001   |
| <b>Sarnat encephalopathy stage at admission</b>                                    |                                     |                     |                    |               |              |          |
| Stage I                                                                            | 45 (73.8)                           | 16 (26.2)           | 1                  | Reference     |              |          |
| Stage II                                                                           | 193 (63.9)                          | 109 (36.1)          | 0.617              | 0.332         | 1.147        | 0.127    |
| Stage III                                                                          | 14 (10.6)                           | 118 (89.4)          | 0.042              | 0.018         | 0.094        | <0.001   |
| <b>Thompson encephalopathy score</b>                                               |                                     |                     |                    |               |              |          |
| At admission                                                                       | 9 (6–11)                            | 13 (9–17)           | 0.862              | 0.831         | 0.895        | <0.001   |
| 24 hours <sup>c</sup>                                                              | 7 (3–11)                            | 12 (9–16)           | 0.865              | 0.835         | 0.896        | <0.001   |
| 48 hours <sup>c</sup>                                                              | 7 (2–10)                            | 12 (7–15)           | 0.872              | 0.843         | 0.903        | <0.001   |
| 72 hours <sup>c</sup>                                                              | 4 (0–8)                             | 10 (3–15)           | 0.868              | 0.839         | 0.898        | <0.001   |
| Maximum score                                                                      | 9 (6–12)                            | 14 (11–17)          | 0.848              | 0.815         | 0.883        | <0.001   |
| <b>Cooling modality</b>                                                            |                                     |                     |                    |               |              |          |
| Selective-head                                                                     | 79 (44.9)                           | 97 (55.1)           | 1                  | Reference     |              |          |
| Whole-body                                                                         | 182 (54.8)                          | 150 (45.2)          | 1.498              | 1.038         | 2.163        | 0.031    |

(continued)

SUPPLEMENTARY TABLE S1. (CONTINUED)

| Background clinical variables                                           | Survival discharge $\leq 28$ days |            | OR                 | 95% CI |       | p      |
|-------------------------------------------------------------------------|-----------------------------------|------------|--------------------|--------|-------|--------|
|                                                                         | Yes (n=262)                       | No (n=247) |                    | Lower  | Upper |        |
| Additive neuroprotective drug                                           |                                   |            |                    |        |       |        |
| Magnesium sulfate                                                       | 67 (53.2)                         | 59 (46.8)  | 1.095              | 0.732  | 1.639 | 0.660  |
| Erythropoietin                                                          | 9 (52.9)                          | 8 (47.1)   | 1.063              | 0.403  | 2.800 | 0.902  |
| Phenobarbital                                                           | 1 (20.0)                          | 4 (80.0)   | 0.233              | 0.026  | 2.097 | 0.194  |
| Any of above                                                            | 82 (51.3)                         | 78 (48.8)  | 0.985              | 0.677  | 1.434 | 0.938  |
| Time of admission after birth <sup>a</sup>                              | 105 ± 86                          | 109 ± 80   | 0.993 <sup>d</sup> | 0.971  | 1.014 | 0.498  |
| Initiating cooling after admission <sup>a</sup>                         | 109 ± 86                          | 102 ± 87   | 1.012 <sup>d</sup> | 0.990  | 1.035 | 0.286  |
| Initiating cooling after birth <sup>a</sup>                             | 214 ± 95                          | 211 ± 97   | 1.003 <sup>d</sup> | 0.985  | 1.022 | 0.730  |
| Time to target temperature after initiating cooling <sup>a</sup>        | 105 ± 183                         | 82 ± 116   | 1.009 <sup>d</sup> | 0.996  | 1.021 | 0.174  |
| Time to target temperature after birth <sup>a</sup>                     | 320 ± 208                         | 292 ± 162  | 1.007 <sup>d</sup> | 0.997  | 1.016 | 0.186  |
| <i>Physiological variables during cooling</i>                           |                                   |            |                    |        |       |        |
| Heart rate (per 10 beat/min)                                            |                                   |            |                    |        |       |        |
| 0 hour <sup>c</sup>                                                     | 129 ± 20                          | 135 ± 19   | 0.857 <sup>e</sup> | 0.777  | 0.946 | 0.003  |
| 3 hours <sup>c</sup>                                                    | 109 ± 18                          | 124 ± 20   | 0.668 <sup>e</sup> | 0.599  | 0.745 | <0.001 |
| 6 hours <sup>c</sup>                                                    | 108 ± 19                          | 123 ± 20   | 0.689 <sup>e</sup> | 0.614  | 0.773 | <0.001 |
| 12 hours <sup>c</sup>                                                   | 109 ± 18                          | 122 ± 18   | 0.690 <sup>e</sup> | 0.613  | 0.777 | <0.001 |
| 24 hours <sup>c</sup>                                                   | 108 ± 17                          | 121 ± 17   | 0.644 <sup>e</sup> | 0.563  | 0.737 | <0.001 |
| 36 hours <sup>c</sup>                                                   | 106 ± 15                          | 119 ± 16   | 0.608 <sup>e</sup> | 0.529  | 0.699 | <0.001 |
| 48 hours <sup>c</sup>                                                   | 103 ± 14                          | 117 ± 16   | 0.522 <sup>e</sup> | 0.449  | 0.607 | <0.001 |
| 60 hours <sup>c</sup>                                                   | 103 ± 13                          | 117 ± 17   | 0.530 <sup>e</sup> | 0.456  | 0.616 | <0.001 |
| 72 hours <sup>c</sup>                                                   | 103 ± 13                          | 117 ± 17   | 0.499 <sup>e</sup> | 0.422  | 0.590 | <0.001 |
| 84 hours <sup>c</sup>                                                   | 116 ± 16                          | 127 ± 21   | 0.732 <sup>e</sup> | 0.660  | 0.811 | <0.001 |
| Mean (0–84 hours <sup>c</sup> )                                         | 109 ± 11                          | 123 ± 13   | 0.409 <sup>e</sup> | 0.335  | 0.500 | <0.001 |
| Mean (3–72 hours <sup>c</sup> )                                         | 106 ± 12                          | 120 ± 14   | 0.429 <sup>e</sup> | 0.354  | 0.519 | <0.001 |
| Mean blood pressure (per 10 mmHg)                                       |                                   |            |                    |        |       |        |
| 0 hour <sup>c</sup>                                                     | 47 ± 9                            | 46 ± 11    | 1.103 <sup>f</sup> | 0.924  | 1.317 | 0.276  |
| 3 hours <sup>c</sup>                                                    | 47 ± 8                            | 47 ± 10    | 0.998 <sup>f</sup> | 0.820  | 1.215 | 0.985  |
| 6 hours <sup>c</sup>                                                    | 47 ± 8                            | 47 ± 9     | 1.052 <sup>f</sup> | 0.858  | 1.289 | 0.625  |
| 12 hours <sup>c</sup>                                                   | 48 ± 8                            | 46 ± 9     | 1.229 <sup>f</sup> | 0.985  | 1.534 | 0.068  |
| 24 hours <sup>c</sup>                                                   | 47 ± 7                            | 47 ± 8     | 1.012 <sup>f</sup> | 0.807  | 1.268 | 0.921  |
| 36 hours <sup>c</sup>                                                   | 48 ± 7                            | 49 ± 8     | 0.891 <sup>f</sup> | 0.693  | 1.145 | 0.366  |
| 48 hours <sup>c</sup>                                                   | 49 ± 6                            | 50 ± 8     | 0.793 <sup>f</sup> | 0.613  | 1.025 | 0.076  |
| 60 hours <sup>c</sup>                                                   | 49 ± 7                            | 52 ± 9     | 0.694 <sup>f</sup> | 0.551  | 0.873 | 0.002  |
| 72 hours <sup>c</sup>                                                   | 51 ± 8                            | 52 ± 9     | 0.830 <sup>f</sup> | 0.671  | 1.026 | 0.085  |
| 84 hours <sup>c</sup>                                                   | 49 ± 8                            | 51 ± 9     | 0.868 <sup>f</sup> | 0.691  | 1.092 | 0.222  |
| Mean (0–84 hours <sup>c</sup> )                                         | 48 ± 5                            | 48 ± 7     | 0.872 <sup>f</sup> | 0.626  | 1.215 | 0.418  |
| Mean (3–72 hours <sup>c</sup> )                                         | 48 ± 5                            | 48 ± 7     | 0.854 <sup>f</sup> | 0.618  | 1.180 | 0.339  |
| Body temperature (per degree)                                           |                                   |            |                    |        |       |        |
| At admission                                                            | 36.2 ± 1.1                        | 35.7 ± 1.4 | 1.372              | 1.157  | 1.627 | <0.001 |
| 0 hour <sup>c</sup>                                                     | 35.4 ± 1.2                        | 35.1 ± 1.3 | 1.176              | 1.010  | 1.369 | 0.037  |
| 3 hours <sup>c</sup>                                                    | 33.7 ± 0.7                        | 33.8 ± 0.7 | 0.774              | 0.600  | 0.999 | 0.049  |
| 6 hours <sup>c</sup>                                                    | 33.7 ± 0.6                        | 33.9 ± 0.6 | 0.510              | 0.370  | 0.703 | <0.001 |
| 12 hours <sup>c</sup>                                                   | 33.7 ± 0.6                        | 33.9 ± 0.6 | 0.588              | 0.424  | 0.815 | 0.001  |
| 24 hours <sup>c</sup>                                                   | 33.7 ± 0.5                        | 33.9 ± 0.5 | 0.459              | 0.316  | 0.666 | <0.001 |
| 36 hours <sup>c</sup>                                                   | 33.7 ± 0.5                        | 33.9 ± 0.5 | 0.460              | 0.316  | 0.670 | <0.001 |
| 48 hours <sup>c</sup>                                                   | 33.7 ± 0.4                        | 33.9 ± 0.5 | 0.440              | 0.302  | 0.639 | <0.001 |
| 60 hours <sup>c</sup>                                                   | 33.7 ± 0.5                        | 33.9 ± 0.6 | 0.446              | 0.314  | 0.633 | <0.001 |
| 72 hours <sup>c</sup>                                                   | 33.8 ± 0.6                        | 33.9 ± 0.6 | 0.610              | 0.452  | 0.823 | 0.001  |
| 84 hours <sup>c</sup>                                                   | 35.6 ± 1.0                        | 35.7 ± 1.0 | 1.016              | 0.775  | 1.331 | 0.902  |
| Mean (0–84 hours <sup>c</sup> )                                         | 34.1 ± 0.5                        | 34.2 ± 0.4 | 0.517              | 0.330  | 0.809 | 0.004  |
| Mean (3–72 hours <sup>c</sup> )                                         | 33.7 ± 0.5                        | 33.9 ± 0.5 | 0.404              | 0.269  | 0.606 | <0.001 |
| Fever $\geq 37.5^\circ\text{C}$ from admission to 84 hours <sup>c</sup> | 28 (51.3)                         | 22 (44.0)  | 1.188              | 0.667  | 2.116 | 0.558  |
| Fever $\geq 38^\circ\text{C}$ from admission to 84 hours <sup>c</sup>   | 9 (50.0)                          | 9 (50.0)   | 0.975              | 0.391  | 2.431 | 0.957  |

<sup>a</sup>Per 0.1 change.

<sup>b</sup>Per 10 mmol/L.

<sup>c</sup>After initiating cooling.

<sup>d</sup>Per 10 minutes.

<sup>e</sup>Per 10 beat/min.

<sup>f</sup>Per 10 mmHg.

BE, base excess; bpm, beat per minutes; CI, confidence interval; OR, odds ratio.
