# Supplementary material for: Body Temperature, Heart Rate, and Short-Term Outcome of Cooled Infants
Source: PubMed Central journal article supplement (PMC6434598; doi:10.1089/ther.2018.0019), 2019-03-06
Supplement: Supp_Table2.pdf [file Supp_Table2.pdf]

SUPPLEMENTARY TABLE S2. CONTROL VARIABLES OF HEART RATE AFTER 0 HOUR OF COOLING

|                                                          | <i>Regression coefficient</i> | <i>95% CI</i> |              | <i>p</i>         |
|----------------------------------------------------------|-------------------------------|---------------|--------------|------------------|
|                                                          |                               | <i>Lower</i>  | <i>Upper</i> |                  |
| <b>(A) Univariate analysis</b>                           |                               |               |              |                  |
| Gestational age (weeks)                                  | 0.145                         | -0.954        | 1.244        | 0.796            |
| Birth weight (kg)                                        | 1.773                         | -2.166        | 5.712        | 0.377            |
| Birth location (outborn)                                 | 1.536                         | -2.614        | 5.685        | 0.467            |
| 10 minutes Apgar score                                   | -0.913                        | -1.919        | 0.093        | 0.073            |
| Cord or first blood gas pH (per 0.1 change)              | -0.732                        | -1.670        | 0.207        | 0.125            |
| Cord or first blood gas base excess (per 10 mmol/L)      | -2.090                        | -3.947        | -0.233       | 0.028            |
| Time of admission after birth <sup>a</sup>               | 0.193                         | -0.033        | 0.420        | 0.094            |
| Initiating cooling after admission <sup>a</sup>          | -0.213                        | -0.445        | 0.020        | 0.072            |
| Initiating cooling after birth <sup>a</sup>              | -0.001                        | -0.192        | 0.190        | 0.993            |
| Sarnat encephalopathy stage at admission                 | 7.177                         | 4.183         | 10.170       | <b>&lt;0.001</b> |
| Thompson encephalopathy score at admission               | 0.424                         | 0.094         | 0.753        | 0.012            |
| Mean blood pressure at 0 hour <sup>b</sup> (per 10 mmHg) | 1.432                         | -0.707        | 3.570        | 0.185            |
| Body temperature at admission (°C)                       | 2.905                         | 1.001         | 4.810        | 0.005            |
| Body temperature at 0 hour <sup>b</sup> (°C)             | 5.573                         | 3.970         | 7.175        | <b>&lt;0.001</b> |
| <b>(B) Multivariate model</b>                            |                               |               |              |                  |
| Cord or first blood gas base excess (per 10 mmol/L)      | -2.620                        | -4.541        | -0.698       | <b>0.008</b>     |
| Thompson encephalopathy score at admission               | 0.490                         | 0.152         | 0.827        | <b>0.005</b>     |
| Body temperature at admission (°C)                       | 3.742                         | 1.904         | 5.580        | <b>&lt;0.001</b> |

Statistical significance for univariate and multivariate analysis was assumed for  $p < 0.003$  (Bonferroni correction) and  $p < 0.05$ , respectively (indicated in bold).

<sup>a</sup>Per 10 minutes.

<sup>b</sup>After initiating cooling.
