# Supplementary material for: Body Temperature, Heart Rate, and Short-Term Outcome of Cooled Infants
Source: PubMed Central journal article supplement (PMC6434598; doi:10.1089/ther.2018.0019), 2019-03-06
Supplement: Supp_Table3.pdf [file Supp_Table3.pdf]

SUPPLEMENTARY TABLE S3. CONTROL VARIABLES OF HEART RATE AFTER 24 HOURS OF COOLING

|                                                                         | Regression<br>coefficient | 95% CI  |        | p                |
|-------------------------------------------------------------------------|---------------------------|---------|--------|------------------|
|                                                                         |                           | Lower   | Upper  |                  |
| <b>(A) Univariate analysis</b>                                          |                           |         |        |                  |
| Gestational age (weeks)                                                 | -1.740                    | -2.788  | -0.693 | <b>0.001</b>     |
| Birth weight (kg)                                                       | 0.315                     | -3.137  | 3.768  | 0.858            |
| Birth location (outborn)                                                | 3.897                     | 0.335   | 7.459  | 0.032            |
| 10 minutes Apgar score                                                  | -2.448                    | -3.187  | -1.709 | <b>&lt;0.001</b> |
| Cord or first blood gas pH (per 0.1 change)                             | -2.053                    | -2.799  | -1.307 | <b>&lt;0.001</b> |
| Cord or first blood gas base excess (per 10 mmol/L)                     | -4.558                    | -6.034  | -3.083 | <b>&lt;0.001</b> |
| Cooling modality (Selective-head)                                       | 1.755                     | -1.865  | 5.375  | 0.340            |
| Time of admission after birth <sup>a</sup>                              | 0.093                     | -0.103  | 0.289  | 0.351            |
| Initiating cooling after admission <sup>a</sup>                         | -0.053                    | -0.251  | 0.145  | 0.596            |
| Initiating cooling after birth <sup>a</sup>                             | 0.024                     | -0.147  | 0.195  | 0.782            |
| Time to reach the target temperature after birth <sup>a</sup>           | 0.032                     | -0.052  | 0.117  | 0.452            |
| Sarnat encephalopathy stage at admission                                | 10.844                    | 8.205   | 13.483 | <b>&lt;0.001</b> |
| Thompson encephalopathy score at admission                              | 0.963                     | 0.662   | 1.265  | <b>&lt;0.001</b> |
| Thompson encephalopathy score at 24 hours <sup>b</sup>                  | 1.030                     | 0.699   | 1.360  | <b>&lt;0.001</b> |
| Mean blood pressure at 0 hour <sup>b</sup> (per 10 mmHg)                | -0.007                    | -1.864  | 1.850  | 0.994            |
| Mean blood pressure at 24 hours <sup>b</sup> (per 10 mmHg)              | -0.623                    | -2.753  | 1.508  | 0.566            |
| Body temperature at admission (°C)                                      | -2.103                    | -3.619  | -0.587 | 0.008            |
| Body temperature at 0 hour <sup>b</sup> (°C)                            | 0.083                     | -1.357  | 1.524  | 0.909            |
| Body temperature at 24 hours <sup>b</sup> (°C)                          | 7.393                     | 4.017   | 10.769 | <b>&lt;0.001</b> |
| Fever $\geq 38^{\circ}\text{C}$ from admission to 84 hours <sup>b</sup> | 1.658                     | -11.190 | 14.506 | 0.786            |
| <b>(B) Multivariate model</b>                                           |                           |         |        |                  |
| Cord or first blood gas base excess (per 10 mmol/L)                     | -3.728                    | -5.239  | -2.216 | <b>&lt;0.001</b> |
| Thompson encephalopathy score at admission                              | 0.777                     | 0.484   | 1.070  | <b>&lt;0.001</b> |
| Body temperature at 24 hours <sup>b</sup> (°C)                          | 6.243                     | 2.968   | 9.517  | <b>&lt;0.001</b> |

Statistical significance for univariate and multivariate analysis was assumed for  $p < 0.003$  (Bonferroni correction) and  $p < 0.05$ , respectively (indicated in bold).

<sup>a</sup>Per 10 minutes.

<sup>b</sup>After initiating cooling.
