# Supplementary material for: Body Temperature, Heart Rate, and Short-Term Outcome of Cooled Infants
Source: PubMed Central journal article supplement (PMC6434598; doi:10.1089/ther.2018.0019), 2019-03-06
Supplement: Supp_Table4.pdf [file Supp_Table4.pdf]

SUPPLEMENTARY TABLE S4. CONTROL VARIABLES OF BODY TEMPERATURE AT ADMISSION

|                                                          | <i>Regression coefficient</i> | <i>95% CI</i> |              | <i>p</i>         |
|----------------------------------------------------------|-------------------------------|---------------|--------------|------------------|
|                                                          |                               | <i>Lower</i>  | <i>Upper</i> |                  |
| <b>(A) Univariate analysis</b>                           |                               |               |              |                  |
| Gestational age (weeks)                                  | 0.093                         | 0.021         | 0.164        | 0.011            |
| Birth weight (kg)                                        | 0.590                         | 0.330         | 0.850        | <b>&lt;0.001</b> |
| Birth location (outborn)                                 | -0.309                        | -0.578        | -0.039       | 0.025            |
| 10 minutes Apgar score                                   | 0.139                         | 0.083         | 0.195        | <b>&lt;0.001</b> |
| Cord or first blood gas pH (per 0.1 change)              | 0.125                         | 0.060         | 0.191        | <b>&lt;0.001</b> |
| Cord or first blood gas base excess (per 10 mmol/L)      | 0.265                         | 0.140         | 0.390        | <b>&lt;0.001</b> |
| Time of admission after birth <sup>a</sup>               | 0.022                         | 0.005         | 0.040        | 0.013            |
| Initiating cooling after admission <sup>a</sup>          | 0.009                         | -0.006        | 0.023        | 0.231            |
| Initiating cooling after birth <sup>a</sup>              | 0.025                         | 0.013         | 0.037        | <b>&lt;0.001</b> |
| Sarnat encephalopathy stage at admission                 | -0.561                        | -0.785        | -0.338       | <b>&lt;0.001</b> |
| Thompson encephalopathy score at admission               | -0.041                        | -0.067        | -0.016       | <b>0.002</b>     |
| Heart rate at 0 hour <sup>b</sup> (per 10 beat/min)      | 0.118                         | 0.034         | 0.202        | 0.009            |
| Mean blood pressure at 0 hour <sup>b</sup> (per 10 mmHg) | 0.173                         | 0.048         | 0.298        | 0.007            |
| <b>(B) Multivariate model</b>                            |                               |               |              |                  |
| Birth location (outborn)                                 | -0.379                        | -0.644        | -0.114       | <b>0.005</b>     |
| Birth weight (kg)                                        | 0.567                         | 0.310         | 0.824        | <b>&lt;0.001</b> |
| Cord or first blood gas base excess (per 10 mmol/L)      | 0.207                         | 0.087         | 0.327        | <b>0.001</b>     |
| Thompson encephalopathy score at admission               | -0.032                        | -0.058        | -0.007       | <b>0.013</b>     |

Statistical significance for univariate and multivariate analysis was assumed for  $p < 0.004$  (Bonferroni correction) and  $p < 0.05$ , respectively (indicated in bold).

<sup>a</sup>Per 10 minutes.

<sup>b</sup>After initiating cooling.
