# Supplementary material for: Body Temperature, Heart Rate, and Short-Term Outcome of Cooled Infants
Source: PubMed Central journal article supplement (PMC6434598; doi:10.1089/ther.2018.0019), 2019-03-06
Supplement: Supp_Table5.pdf [file Supp_Table5.pdf]

SUPPLEMENTARY TABLE S5. CONTROL VARIABLES OF BODY TEMPERATURE AFTER 24 HOURS OF COOLING

|                                                                         | Regression coefficient | 95% CI |        | p                |
|-------------------------------------------------------------------------|------------------------|--------|--------|------------------|
|                                                                         |                        | Lower  | Upper  |                  |
| <b>(A) Univariate analysis</b>                                          |                        |        |        |                  |
| Gestational age (weeks)                                                 | 0.006                  | -0.021 | 0.033  | 0.652            |
| Birth weight (kg)                                                       | -0.002                 | -0.097 | 0.094  | 0.974            |
| Birth location (outborn)                                                | 0.045                  | -0.059 | 0.148  | 0.398            |
| 10-minutes Apgar score                                                  | -0.035                 | -0.057 | -0.013 | <b>0.002</b>     |
| Cord or first blood gas pH (per 0.1 change)                             | -0.015                 | -0.042 | 0.013  | 0.280            |
| Cord or first blood gas base excess (per 10 mmol/L)                     | -0.018                 | -0.067 | 0.031  | 0.472            |
| Cooling modality (selective-head)                                       | 0.409                  | 0.315  | 0.503  | <b>&lt;0.001</b> |
| Time of admission after birth <sup>a</sup>                              | -0.001                 | -0.007 | 0.005  | 0.815            |
| Initiating cooling after admission <sup>a</sup>                         | 0.010                  | 0.004  | 0.015  | <b>0.001</b>     |
| Initiating cooling after birth <sup>a</sup>                             | 0.008                  | 0.003  | 0.013  | <b>0.001</b>     |
| Time to reach the target temperature after birth <sup>a</sup>           | 0.005                  | 0.003  | 0.008  | <b>&lt;0.001</b> |
| Sarnat encephalopathy stage at admission                                | 0.167                  | 0.087  | 0.247  | <b>&lt;0.001</b> |
| Thompson encephalopathy score at admission                              | 0.010                  | 0.001  | 0.018  | 0.021            |
| Thompson encephalopathy score at 24 hours <sup>b</sup>                  | 0.009                  | 0.001  | 0.017  | 0.034            |
| Heart rate at 0 hour <sup>b</sup> (per 10 beat/min)                     | 0.030                  | 0.002  | 0.058  | 0.035            |
| Heart rate at 24 hours <sup>b</sup> (per 10 beat/min)                   | 0.060                  | 0.032  | 0.089  | <b>&lt;0.001</b> |
| Mean blood pressure at 0 hour <sup>b</sup> (per 10 mmHg)                | 0.008                  | -0.046 | 0.062  | 0.762            |
| Mean blood pressure at 24 hours <sup>b</sup> (per 10 mmHg)              | 0.050                  | -0.041 | 0.140  | 0.257            |
| Body temperature at admission (°C)                                      | -0.017                 | -0.054 | 0.020  | 0.374            |
| Fever $\geq 38^{\circ}\text{C}$ from admission to 84 hours <sup>b</sup> | 0.143                  | -0.156 | 0.441  | 0.337            |
| <b>(B) Multivariate model</b>                                           |                        |        |        |                  |
| 10 minutes Apgar score                                                  | -0.027                 | -0.047 | -0.007 | <b>0.009</b>     |
| Cooling modality (selective-head)                                       | 0.395                  | 0.301  | 0.490  | <b>&lt;0.001</b> |

Statistical significance for univariate and multivariate analysis was assumed for  $p < 0.003$  (Bonferroni correction) and  $p < 0.05$ , respectively (indicated in bold).

<sup>a</sup>Per 10 minutes.

<sup>b</sup>After initiating cooling.
